# Supplementary material for: Active displacement of RecA filaments by UvrD translocase activity
Source: PubMed Central journal article supplement — Nucleic Acids Res. 2015 Mar 30;43(8):4133–49. doi: 10.1093/nar/gkv186 (PMC4417151; doi:10.1093/nar/gkv186), 2015-03-30

## UvrD Supplement

Figure S1. Electron micrograph showing complexes of SSB and circular M13mp18 ssDNA done under the same conditions as described for Figure 2, but without addition of RecA protein and UvrD protein.

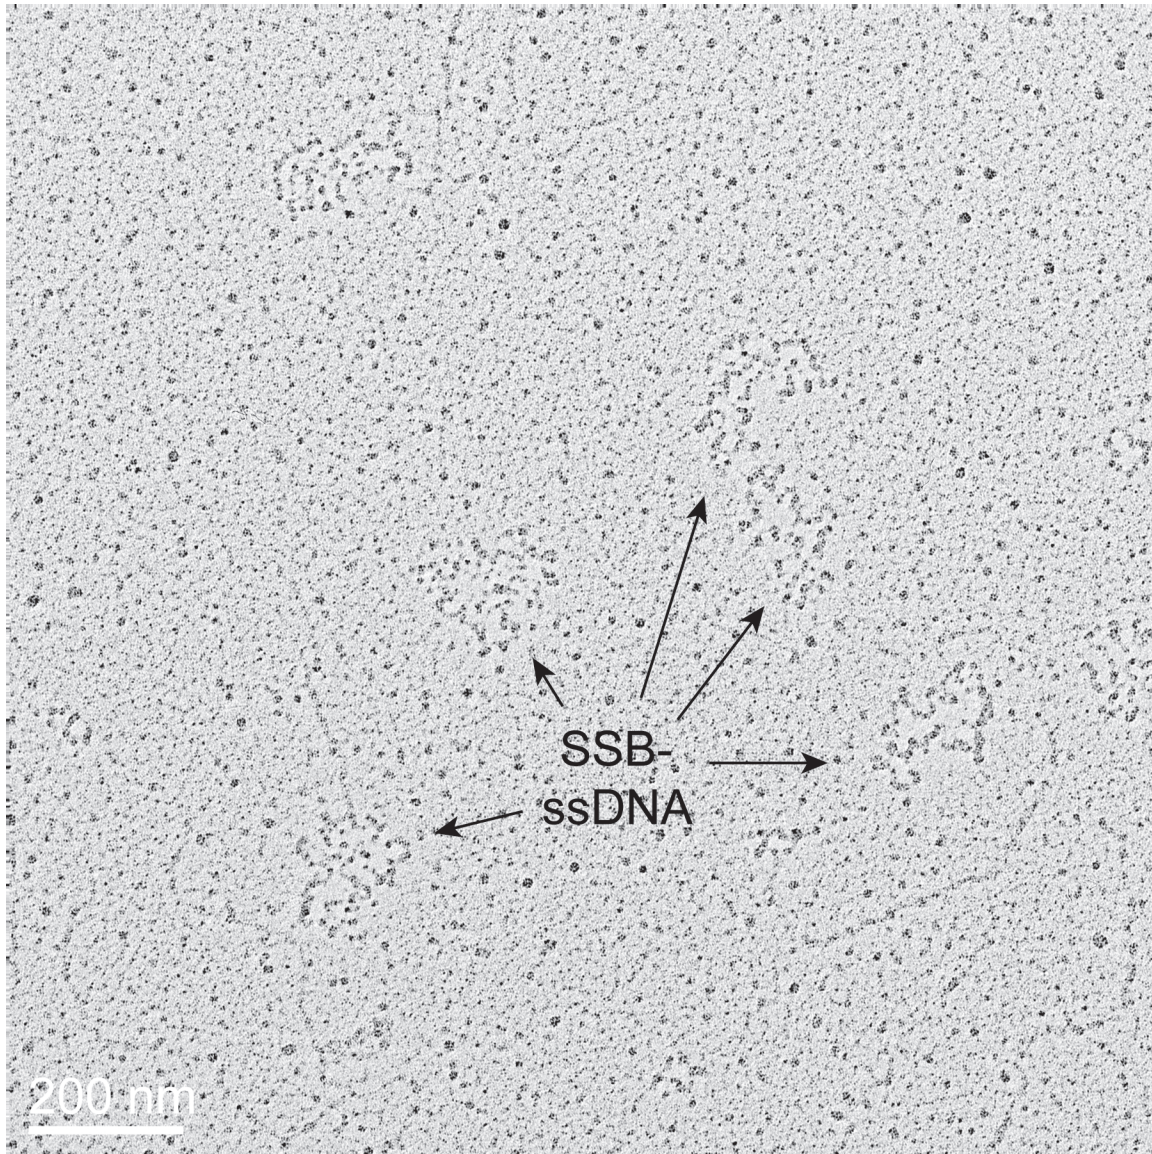

Supplement: supp_gkv186_nar-03403-m-2014-File013.pdf [file supp_gkv186_nar-03403-m-2014-File013.pdf]
